# Supplementary material
Source: Springer Nature journal article supplement (https://www.springermedizin.de/resource/supplementary/12985_2013_2440_MOESM3_ESM.pdf/9606728)

(A)

S ORF

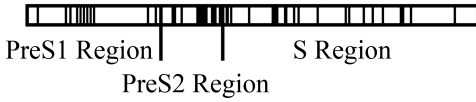

P ORF

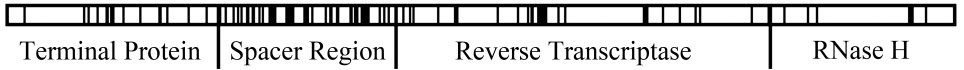

X ORF

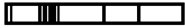

(B)

S ORF

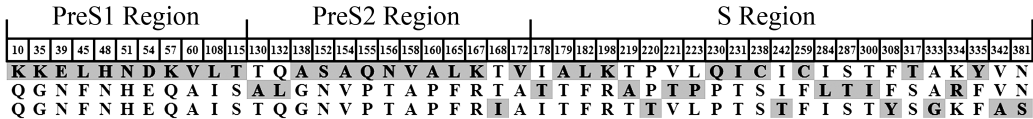

P ORF

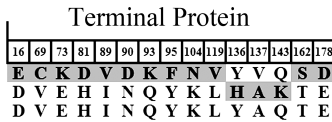

Spacer Region

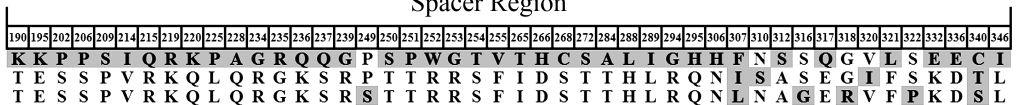

Reverse Transcriptase

RNase H

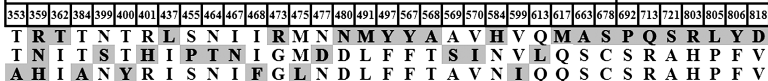

X ORF

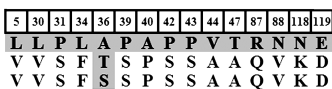

Supplement: MOESM3 [file 9606728]
